# Supplementary material
Source: HighWire-hosted journal article supplement (https://diabetes.diabetesjournals.org/content/suppl/2006/06/02/55.6.1899)
Supplement: 1677AppendixSupplement1.pdf [file 1677AppendixSupplement1.pdf]

*Supplement 1: Primers that were employed instead of the previously published primers*

---

| Designation    | Forward                          | Reverse                           |
|----------------|----------------------------------|-----------------------------------|
| P1 promoter    | 5'-CAA-GGA-TCC-AGA-AGA-TTG-GC    | 5'-GGT-CCA-GTG-CAG-CAC-TGT-AG     |
| P2 promoter    | 5'-CGC-CTG-TAT-GCA-ACT-CC        | 5'-CAA-AGC-TGA-CCG-CAG-TC         |
| exons 1 and 1C | 5'-TCA-TGA-TGC-CTG-CCT-TGT-AC    | 5'-CTC-TCT-GAA-CCT-AGG-CCC-AA     |
| exon 1B        | 5'-CAT-GCG-GAC-CTG-TTG-GAG-TG    | 5'-CAC-AAG-ATT-CCA-GAC-CTC-AG     |
| exon 8         | 5'-TTG TTG AGG TCC CTG AAT CCT T | 5'-ACA GAT ATC CAC GCA TCC ATA CA |

---
