# Supplementary material
Source: HighWire-hosted journal article supplement (https://diabetes.diabetesjournals.org/content/suppl/2006/06/02/55.6.1899)
Supplement: 1677AppendixSupplement2.pdf [file 1677AppendixSupplement2.pdf]

*Supplement 2: HNF4A polymorphisms observed in Norwegian MODY patients*

| <i>HNF4A</i> gene location | Codon or relative nucleotide position | Nucleotide change | Designation at protein level | Frequency          |
|----------------------------|---------------------------------------|-------------------|------------------------------|--------------------|
| 5' UTR                     | nt -67                                | G to C            | -                            | G – 0.97, C – 0.03 |
| Intron 1a                  | nt +33                                | G to A            | -                            | G – 0.99, A – 0.01 |
| Exon 1c                    | 49                                    | GTG to ATG        | V49M                         | G – 0.82, A – 0.18 |
| Intron 1b                  | nt -38                                | C to T            | -                            | C – 0.47, T – 0.53 |
| Intron 1b                  | nt -5                                 | C to T            | -                            | C – 0.84, T – 0.16 |
| Exon 2                     | 58                                    | GCC to GCT        | A58A                         | C – 0.97, T – 0.03 |
| Exon 4                     | 130                                   | ACT to ATT        | T130I                        | C – 0.97, T – 0.03 |
| Intron 4                   | nt +140                               | C to T            | -                            | C – 0.99, T – 0.01 |
| Intron 4                   | nt -52                                | G to A            | -                            | G – 0.99, A – 0.01 |
| Exon 5                     | 160                                   | GTC to ATC        | V160I                        | G – 0.99, A – 0.01 |
| Exon 7                     | 255                                   | GTG to ATG        | V255M                        | G – 0.99, A – 0.01 |
| Intron 7                   | nt -88                                | C to T            | -                            | C – 0.59, T – 0.41 |

Exon 9

392

AAC to AAT

-

C – 0.99, T – 0.01

---

Allele frequencies were calculated based on 95 diabetic MODY probands. Previously, V49M, A58A, T130I and V255M have all been reported as polymorphisms. The variant V160I, found in a single subject, is unlikely to be pathogenic since it occurs in an unconserved amino acid residue and since the rat HNF4A gene contains isoleucine in this position.
