# Supplementary material
Source: HighWire-hosted journal article supplement (https://diabetes.diabetesjournals.org/content/suppl/2006/06/02/55.6.1899)
Supplement: 1677AppendixSupplement3.pdf [file 1677AppendixSupplement3.pdf]

*Supplement 3: Two point parametric analysis, MLOD scores for the P2 -192C>G variant.*

---

|       | Recombination fraction |      |      |      |      |      |      |      |      |      |
|-------|------------------------|------|------|------|------|------|------|------|------|------|
|       | 0.00                   | 0.05 | 0.10 | 0.15 | 0.20 | 0.25 | 0.30 | 0.35 | 0.40 | 0.45 |
| N88   | 1.65                   | 2.82 | 3.05 | 3.00 | 2.79 | 2.48 | 2.08 | 1.61 | 1.09 | 0.54 |
| N510  | 0.80                   | 0.69 | 0.58 | 0.48 | 0.37 | 0.27 | 0.17 | 0.10 | 0.04 | 0.01 |
| Total | 2.45                   | 3.51 | 3.63 | 3.47 | 3.16 | 2.75 | 2.26 | 1.71 | 1.13 | 0.55 |

---
